# Supplementary material for: An aromatic ionomer in the anode catalyst layer improves the start-up durability of polymer electrolyte fuel cells
Source: Royal Society of Chemistry journal article supplement (doi:10.1039/d1ya00024a), 2021-11-23
Supplement: d1ya00024a1.pdf [file d1ya00024a1.pdf]

**Supplementary information**

# Aromatic ionomer in the anode catalyst layer improves start-up durability of polymer electrolyte fuel cells

Toshiki Tanaka,<sup>a</sup> Makoto Uchida,<sup>b,\*</sup> and Kenji Miyatake<sup>b,c,d,\*</sup>

<sup>a</sup> Interdisciplinary Graduate School of Medicine and Engineering, University of Yamanashi, 4 Takeda, Kofu, Yamanashi 400-8510, Japan

<sup>b</sup> Fuel Cell Nanomaterials Center, University of Yamanashi, 6-43 Miyamae-cho, Kofu 400-0021, Japan

<sup>c</sup> Clean Energy Research Center, University of Yamanashi, 4 Takeda, Kofu, Yamanashi 400-8510, Japan

<sup>d</sup> Department of Applied Chemistry, Waseda University, Tokyo 169-8555, Japan

\*Corresponding authors

E-mail addresses: miyatake@yamanashi.ac.jp (K. Miyatake)

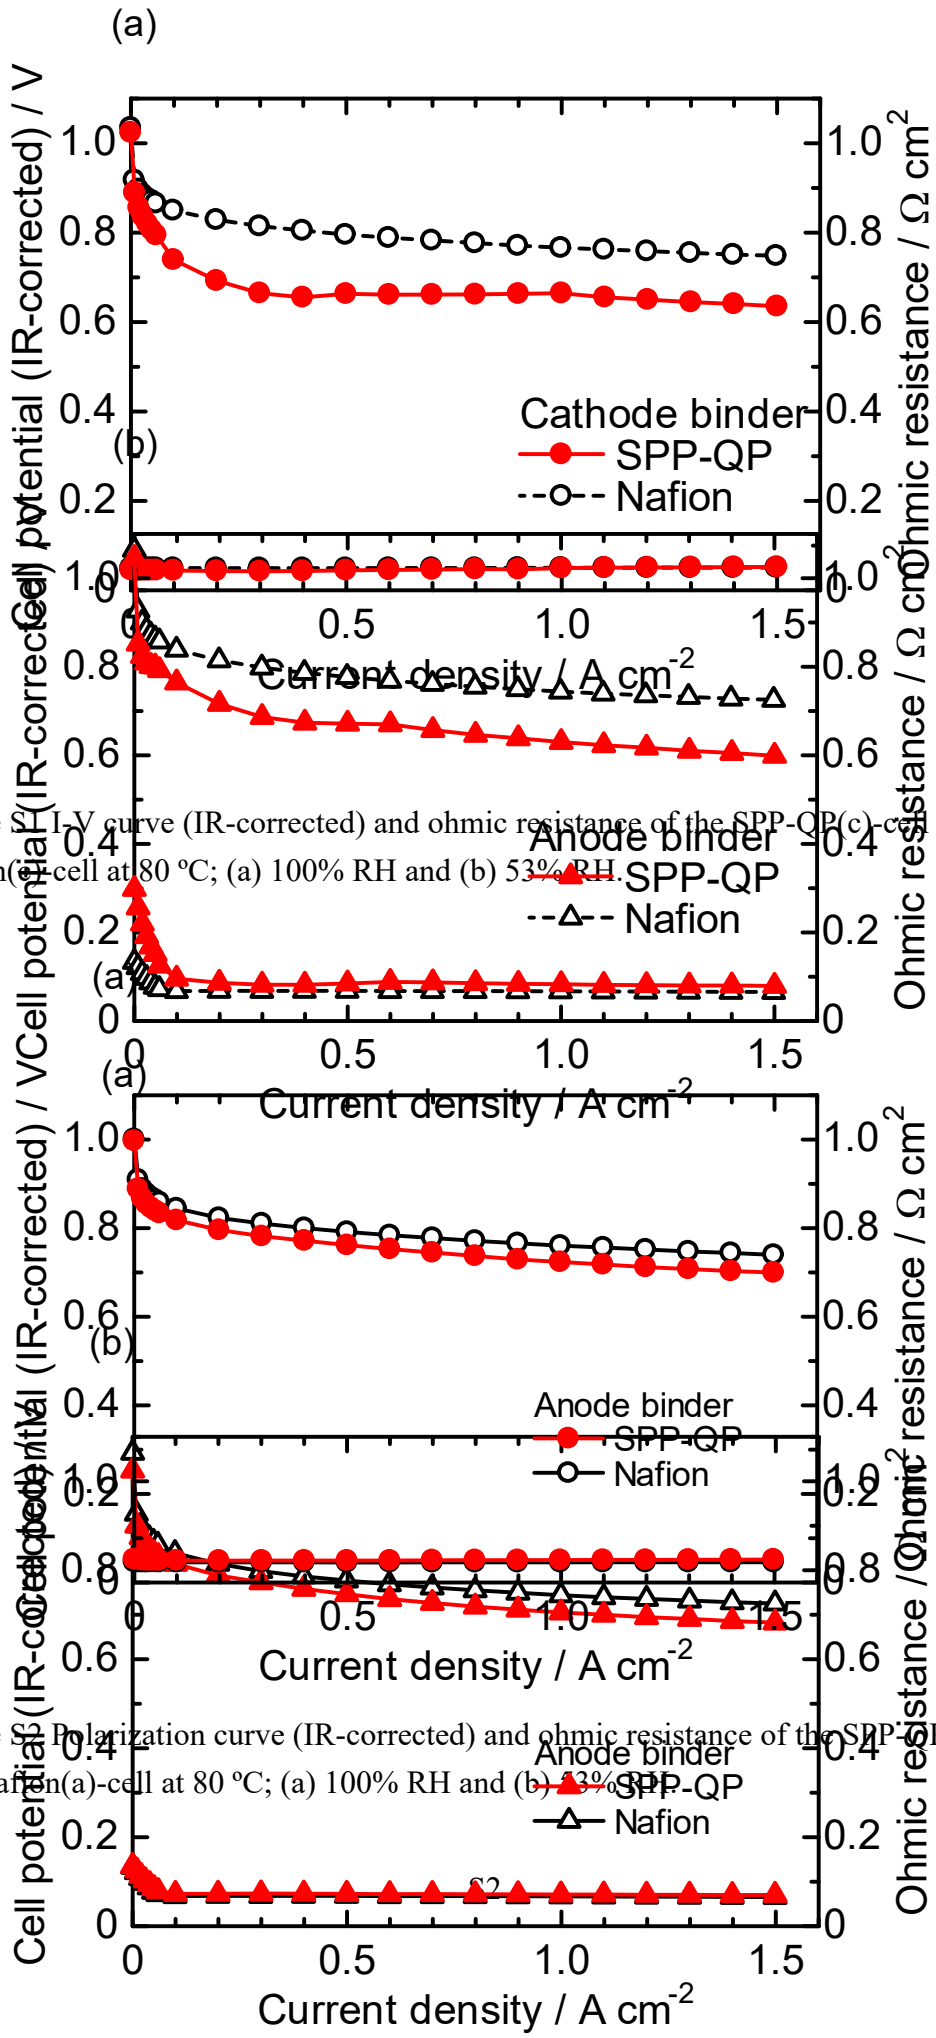

Figure 5. Polarization curve (IR-corrected) and ohmic resistance of the SPP-QP(a)-cell and Nafion(b)-cell at 80 °C; (a) 100% RH and (b) 53% RH.

Figure 6. Polarization curve (IR-corrected) and ohmic resistance of the SPP-QP(a)-cell and Nafion(b)-cell at 80 °C; (a) 100% RH and (b) 53% RH.
